# Supplementary material for: All-in-One Pediatric Parenteral Nutrition Admixtures with an Extended Shelf Life—Insight in Correlations between Composition and Physicochemical Parameters
Source: MDPI journal article supplement (doi:10.3390/pharmaceutics13071017), 2021-07-02
Supplement: s1 [file s1]

# Supplementary Materials: All-In-One Pediatric Parenteral Nutrition Admixtures with an Extended Shelf Life—Insight in Correlations between Composition and Physicochemical Parameters

Aleksandra Gostyńska, Joanna Starkowska, Paulina Sobierajska, Anna Jelińska, Maciej Stawny

**Table S1.** Composition of PN admixtures

| PN variations | Amino acids <sup>1</sup> | Glucose <sup>2</sup> | Lipid emulsion <sup>3</sup> | Sodium <sup>4</sup> | Potassium <sup>5</sup> | Magnesium <sup>6</sup> | Calcium <sup>7</sup> | Phosphate <sup>8</sup> |
|---------------|--------------------------|----------------------|-----------------------------|---------------------|------------------------|------------------------|----------------------|------------------------|
|               |                          | [g/L]                |                             |                     |                        | [mmol/L]               |                      |                        |
| 1             | 20.7                     | 149.4                | 41.5                        | 3.53                | 4.15                   | -                      | -                    | -                      |
| 2             | 20.3                     | 146.2                | 40.6                        | 21.57               | 25.38                  | -                      | -                    | -                      |
| 3             | 18.4                     | 132.7                | 36.9                        | 97.93               | 115.21                 | -                      | -                    | -                      |
| 4             | 20.8                     | 150.0                | 41.7                        | 0                   | -                      | -                      | -                    | -                      |
| 5             | 20.8                     | 149.6                | 41.6                        | 0                   | -                      | 2.08                   | -                    | -                      |
| 6             | 20.6                     | 148.1                | 41.1                        | 0                   | -                      | 10.28                  | -                    | -                      |
| 7             | 20.7                     | 149.3                | 41.5                        | 0                   | -                      | -                      | 0.98                 | -                      |
| 8             | 20.5                     | 147.4                | 41.0                        | 0                   | -                      | -                      | 3.85                 | -                      |
| 9             | 20.1                     | 145.0                | 40.3                        | 0                   | -                      | -                      | 7.54                 | -                      |
| 10            | 20.7                     | 149.3                | 41.5                        | 0                   | -                      | -                      | 0.98                 | -                      |
| 11            | 20.4                     | 147.1                | 40.8                        | 0                   | -                      | 2.04                   | 3.84                 | -                      |
| 12            | 19.9                     | 143.2                | 39.8                        | 0                   | -                      | 9.94                   | 7.45                 | -                      |
| 13            | 20.7                     | 148.7                | 41.3                        | 3.51                | 4.13                   | 0.00                   | 0.98                 | -                      |
| 14            | 19.9                     | 143.4                | 39.8                        | 21.16               | 24.90                  | 1.99                   | 3.74                 | -                      |
| 15            | 17.7                     | 127.3                | 35.4                        | 93.96               | 110.54                 | 8.84                   | 6.63                 | -                      |
| 16            | 20.8                     | 149.7                | 41.6                        | 4.36                | -                      | -                      | -                    | 2.18                   |
| 17            | 20.7                     | 149.3                | 41.5                        | 8.72                | -                      | -                      | -                    | 4.36                   |
| 18            | 20.4                     | 146.8                | 40.8                        | 42.42               | -                      | -                      | -                    | 21.21                  |
| 19            | 20.6                     | 148.4                | 41.2                        | 7.82                | 4.12                   | 0.00                   | 0.97                 | 2.16                   |
| 20            | 19.8                     | 142.8                | 39.7                        | 29.41               | 24.79                  | 1.98                   | 3.73                 | 4.17                   |
| 21            | 17.4                     | 125.0                | 34.7                        | 128.38              | 108.54                 | 8.68                   | 6.51                 | 18.06                  |
| 22            | 20.5                     | 147.5                | 41.0                        | 14.11               | 16.60                  | -                      | -                    | -                      |
| 23            | 19.8                     | 142.6                | 39.6                        | 43.15               | 50.76                  | -                      | -                    | -                      |
| 24            | 18.9                     | 135.8                | 37.7                        | 78.34               | 92.17                  | -                      | -                    | -                      |
| 25            | 20.8                     | 149.6                | 41.6                        | 0                   | -                      | 2.08                   | -                    | -                      |
| 26            | 20.7                     | 149.2                | 41.5                        | 0                   | -                      | 4.16                   | -                    | -                      |
| 27            | 20.6                     | 148.5                | 41.2                        | 0                   | -                      | 8.23                   | -                    | -                      |
| 28            | 20.7                     | 148.8                | 41.3                        | 0                   | -                      | -                      | 1.87                 | -                      |
| 29            | 20.0                     | 143.7                | 39.9                        | 0                   | -                      | -                      | 9.68                 | -                      |
| 30            | 19.2                     | 137.9                | 38.3                        | 0                   | -                      | -                      | 19.03                | -                      |
| 31            | 20.6                     | 148.4                | 41.2                        | 0                   | -                      | 2.07                   | 1.87                 | -                      |
| 32            | 19.9                     | 143.0                | 39.7                        | 0                   | -                      | 4.08                   | 9.65                 | -                      |
| 33            | 19.0                     | 136.6                | 38.0                        | 0                   | -                      | 7.95                   | 18.79                | -                      |
| 34            | 20.3                     | 146.0                | 40.5                        | 14.05               | 16.53                  | 2.07                   | 1.86                 | -                      |
| 35            | 18.9                     | 136.2                | 37.8                        | 42.32               | 49.79                  | 3.98                   | 9.41                 | -                      |
| 36            | 17.3                     | 124.8                | 34.7                        | 75.17               | 88.43                  | 7.07                   | 16.71                | -                      |
| 37            | 20.8                     | 149.6                | 41.6                        | 5.2                 | -                      | -                      | -                    | 2.60                   |
| 38            | 20.7                     | 148.8                | 41.3                        | 16.6                | -                      | -                      | -                    | 8.30                   |
| 39            | 20.5                     | 147.5                | 41.0                        | 32.62               | -                      | -                      | -                    | 16.31                  |
| 40            | 20.2                     | 145.6                | 40.4                        | 19.18               | 16.49                  | 2.06                   | 1.86                 | 2.58                   |
| 41            | 18.8                     | 135.2                | 37.6                        | 58.01               | 49.58                  | 3.97                   | 9.37                 | 7.93                   |
| 42            | 17.1                     | 123.1                | 34.2                        | 101.59              | 86.84                  | 6.95                   | 16.41                | 13.89                  |

<sup>1</sup> – the source of amino acids was Aminoplasmal Paed 10% (B. Braun Melsungen AG, Melsungen, Germany)

<sup>2</sup> – the source of glucose was Glucose 40% (B. Braun Melsungen AG, Melsungen, Germany)

<sup>3</sup> – all PN variations were prepared using each of the following medicinal products: Lipidem 20% (B. Braun Melsungen AG, Melsungen, Germany), Clinoliec 20% (Baxter, Lessines, Belgium), Intralipid 20% (Fresenius Kabi AB, Uppsala, Sweden), and Smoflipid 20% (Fresenius Kabi AB, Uppsala, Sweden)

<sup>4</sup> – the source of sodium was Natrium chloratum 10% (B. Braun Melsungen AG, Melsungen, Germany)

<sup>5</sup> – the source of potassium was Kalium chloratum 15% (WZF Polfa S.A., Warsaw, Poland)

<sup>6</sup> – the source of magnesium was Inj. Magnesii Sulfurici 20% (WZF Polfa S.A., Warsaw, Poland)

<sup>7</sup> – the source of calcium was Calcio gluconato 1000 mg/10mL (Added Pharma, Netherlands)

<sup>8</sup> – the source of phosphate was Glycophos 216 mg/mL (Fresenius Kabi AB, Uppsala, Sweden)

**Table S2.** Physicochemical parameters of PN admixtures upon preparation (t = 0) and after seven days of storage (t = 7).

| Formulation | MDD [nm]       |                | PDI         |             | DV(90) [nm]    |                | pH          |             | Osmolality [mOsm/kg] |           | Potential zeta [mV] |               |
|-------------|----------------|----------------|-------------|-------------|----------------|----------------|-------------|-------------|----------------------|-----------|---------------------|---------------|
|             | t = 0          | t = 7          | t = 0       | t = 7       | t = 0          | t = 7          | t = 0       | t = 7       | t = 0                | t = 7     | t = 0               | t = 7         |
| PN 1 1      | 241.40 ± 5.63  | 245.50 ± 2.10  | 0.07 ± 0.02 | 0.10 ± 0.02 | 346.67 ± 14.01 | 362.67 ± 11.02 | 5.99 ± 0.01 | 5.98 ± 0.01 | 1366 ± 14            | 1366 ± 15 | -36.53 ± 0.40       | -33.07 ± 2.20 |
| PN 1 2      | 247.30 ± 1.74  | 244.60 ± 0.26  | 0.08 ± 0.01 | 0.07 ± 0.01 | 367.67 ± 5.03  | 352.33 ± 10.97 | 5.96 ± 0.00 | 5.96 ± 0.01 | 1428 ± 4             | 1437 ± 3  | 31.53 ± 1.00        | -19.40 ± 0.62 |
| PN 1 3      | 246.90 ± 6.08  | 248.07 ± 6.86  | 0.12 ± 0.03 | 0.09 ± 0.02 | 374.00 ± 16.52 | 365.00 ± 22.11 | 5.94 ± 0.00 | 5.94 ± 0.01 | 1650 ± 1             | 1670 ± 2  | -18.07 ± 0.32       | -18.40 ± 0.44 |
| PN 1 4      | 245.10 ± 3.10  | 247.50 ± 4.86  | 0.07 ± 0.03 | 0.06 ± 0.01 | 355.67 ± 15.28 | 359.33 ± 19.66 | 6.07 ± 0.00 | 6.03 ± 0.02 | 1373 ± 4             | 1375 ± 3  | -38.63 ± 0.25       | -29.27 ± 0.76 |
| PN 1 5      | 247.13 ± 9.96  | 247.67 ± 1.30  | 0.09 ± 0.02 | 0.09 ± 0.01 | 365.33 ± 29.84 | 371.33 ± 5.86  | 6.00 ± 0.00 | 5.97 ± 0.00 | 1378 ± 0             | 1366 ± 2  | -23.50 ± 0.26       | -23.00 ± 0.72 |
| PN 1 6      | 249.03 ± 2.76  | 241.17 ± 3.28  | 0.08 ± 0.02 | 0.07 ± 0.01 | 363.67 ± 16.50 | 340.33 ± 5.69  | 5.96 ± 0.00 | 5.95 ± 0.00 | 1369 ± 1             | 1360 ± 3  | -14.53 ± 0.32       | -13.20 ± 0.50 |
| PN 1 7      | 251.67 ± 6.94  | 245.63 ± 8.22  | 0.09 ± 0.02 | 0.09 ± 0.01 | 371.67 ± 21.36 | 359.67 ± 23.86 | 5.95 ± 0.00 | 5.97 ± 0.01 | 1374 ± 3             | 1377 ± 3  | -28.10 ± 0.36       | -29.87 ± 0.59 |
| PN 1 8      | 241.70 ± 1.31  | 245.33 ± 4.73  | 0.09 ± 0.03 | 0.08 ± 0.02 | 345.67 ± 11.55 | 352.67 ± 16.07 | 5.93 ± 0.00 | 5.96 ± 0.01 | 1361 ± 2             | 1361 ± 1  | -19.97 ± 0.15       | -18.93 ± 0.55 |
| PN 1 9      | 249.43 ± 6.09  | 247.87 ± 12.59 | 0.09 ± 0.01 | 0.12 ± 0.02 | 364.67 ± 11.15 | 371.67 ± 30.02 | 5.94 ± 0.00 | 5.96 ± 0.00 | 1344 ± 8             | 1341 ± 5  | -15.30 ± 0.61       | -14.57 ± 0.81 |
| PN 1 10     | 253.27 ± 3.41  | 242.37 ± 3.84  | 0.09 ± 0.01 | 0.06 ± 0.01 | 378.67 ± 3.51  | 343.00 ± 7.00  | 5.95 ± 0.01 | 5.95 ± 0.01 | 1370 ± 4             | 1376 ± 3  | -27.47 ± 0.61       | -25.00 ± 0.46 |
| PN 1 11     | 250.53 ± 12.34 | 255.30 ± 4.20  | 0.10 ± 0.04 | 0.10 ± 0.01 | 373.67 ± 30.73 | 388.00 ± 9.64  | 5.93 ± 0.00 | 5.94 ± 0.01 | 1336 ± 10            | 1360 ± 1  | -17.23 ± 0.06       | -16.73 ± 0.45 |
| PN 1 12     | 247.73 ± 10.28 | 246.40 ± 2.55  | 0.09 ± 0.04 | 0.09 ± 0.02 | 356.00 ± 28.58 | 363.33 ± 7.09  | 5.94 ± 0.01 | 5.94 ± 0.01 | 1329 ± 3             | 1337 ± 8  | -9.28 ± 0.27        | -10.18 ± 0.33 |
| PN 1 13     | 252.07 ± 7.33  | 253.47 ± 3.40  | 0.10 ± 0.01 | 0.10 ± 0.00 | 376.67 ± 15.14 | 384.33 ± 8.14  | 5.94 ± 0.00 | 5.95 ± 0.00 | 1397 ± 14            | 1386 ± 2  | -25.50 ± 0.52       | -25.97 ± 0.76 |
| PN 1 14     | 252.60 ± 1.56  | 242.37 ± 6.01  | 0.09 ± 0.02 | 0.08 ± 0.03 | 380.33 ± 10.21 | 349.33 ± 19.86 | 5.91 ± 0.00 | 5.91 ± 0.00 | 1419 ± 7             | 1422 ± 1  | -15.80 ± 0.20       | -15.53 ± 0.38 |
| PN 1 15     | 242.30 ± 2.07  | 246.73 ± 1.89  | 0.06 ± 0.02 | 0.10 ± 0.01 | 347.00 ± 10.44 | 365.33 ± 7.77  | 5.92 ± 0.01 | 5.91 ± 0.00 | 1614 ± 5             | 1618 ± 7  | -8.63 ± 0.55        | -28.30 ± 0.69 |
| PN 1 16     | 242.17 ± 5.99  | 243.47 ± 5.98  | 0.08 ± 0.01 | 0.07 ± 0.00 | 351.33 ± 17.16 | 348.33 ± 16.01 | 6.23 ± 0.00 | 6.23 ± 0.00 | 1382 ± 3             | 1381 ± 7  | -34.33 ± 0.32       | -40.57 ± 0.76 |
| PN 1 17     | 252.50 ± 3.14  | 244.33 ± 5.10  | 0.10 ± 0.01 | 0.08 ± 0.02 | 383.33 ± 2.89  | 352.33 ± 20.65 | 6.39 ± 0.00 | 6.41 ± 0.01 | 1376 ± 3             | 1390 ± 0  | -36.83 ± 0.95       | -39.73 ± 0.31 |
| PN 1 18     | 243.73 ± 5.95  | 245.90 ± 7.71  | 0.07 ± 0.01 | 0.08 ± 0.03 | 352.00 ± 15.39 | 358.00 ± 24.43 | 6.89 ± 0.00 | 6.93 ± 0.00 | 1402 ± 2             | 1402 ± 10 | -41.30 ± 1.71       | -40.93 ± 0.65 |

|      |    |               |               |             |             |                |                |             |             |           |           |               |               |
|------|----|---------------|---------------|-------------|-------------|----------------|----------------|-------------|-------------|-----------|-----------|---------------|---------------|
| PN 1 | 19 | 243.13 ± 5.13 | 246.87 ± 6.41 | 0.08 ± 0.04 | 0.08 ± 0.01 | 348.67 ± 16.20 | 363.00 ± 21.17 | 6.21 ± 0.01 | 6.22 ± 0.02 | 1399 ± 10 | 1382 ± 7  | -24.60 ± 0.10 | -27.57 ± 0.67 |
| PN 1 | 20 | 246.57 ± 4.80 | 246.37 ± 3.79 | 0.09 ± 0.01 | 0.10 ± 0.01 | 365.33 ± 11.93 | 364.00 ± 12.53 | 6.29 ± 0.01 | 6.29 ± 0.00 | 1428 ± 4  | 1419 ± 4  | -16.53 ± 0.47 | -17.40 ± 0.79 |
| PN 1 | 21 | 240.73 ± 4.04 | 241.80 ± 2.85 | 0.09 ± 0.02 | 0.08 ± 0.02 | 350.67 ± 16.07 | 353.67 ± 11.02 | 6.65 ± 0.01 | 6.65 ± 0.00 | 1626 ± 3  | 1642 ± 3  | -13.17 ± 0.21 | -13.37 ± 0.64 |
| PN 1 | 22 | 244.73 ± 1.30 | 251.63 ± 5.00 | 0.07 ± 0.02 | 0.11 ± 0.01 | 352.00 ± 6.56  | 371.00 ± 16.70 | 5.98 ± 0.02 | 5.99 ± 0.00 | 1458 ± 5  | 1453 ± 19 | -29.73 ± 0.35 | -18.33 ± 2.64 |
| PN 1 | 23 | 247.53 ± 6.12 | 248.93 ± 1.30 | 0.10 ± 0.01 | 0.09 ± 0.01 | 365.33 ± 21.13 | 367.33 ± 4.93  | 5.97 ± 0.01 | 5.99 ± 0.01 | 1501 ± 6  | 1501 ± 3  | -26.17 ± 0.51 | -21.00 ± 0.70 |
| PN 1 | 24 | 249.93 ± 3.09 | 248.33 ± 2.41 | 0.10 ± 0.01 | 0.1 ± 0.01  | 375.00 ± 11.79 | 365.33 ± 1.53  | 5.98 ± 0.01 | 5.98 ± 0.00 | 1609 ± 5  | 1597 ± 5  | -21.73 ± 2.51 | -17.53 ± 2.36 |
| PN 1 | 25 | 245.60 ± 6.94 | 244.00 ± 3.81 | 0.07 ± 0.05 | 0.08 ± 0.02 | 360.67 ± 29.26 | 355.33 ± 13.58 | 6.03 ± 0.01 | 6.04 ± 0.00 | 1373 ± 7  | 1369 ± 10 | -30.93 ± 0.64 | -14.30 ± 0.30 |
| PN 1 | 26 | 241.13 ± 2.48 | 250.83 ± 2.60 | 0.08 ± 0.01 | 0.1 ± 0.02  | 348.67 ± 12.66 | 374.33 ± 14.29 | 6.01 ± 0.01 | 6.03 ± 0.01 | 1371 ± 0  | 1365 ± 11 | -19.93 ± 0.72 | -18.73 ± 0.45 |
| PN 1 | 27 | 247.37 ± 2.25 | 254.33 ± 6.05 | 0.08 ± 0.00 | 0.08 ± 0.01 | 367.33 ± 9.61  | 377.00 ± 12.77 | 5.99 ± 0.00 | 6.01 ± 0.01 | 1368 ± 6  | 1363 ± 1  | -20.87 ± 0.31 | -14.40 ± 0.46 |
| PN 1 | 28 | 245.87 ± 2.70 | 251.67 ± 3.09 | 0.09 ± 0.02 | 0.09 ± 0.01 | 361.33 ± 11.55 | 377.00 ± 8.54  | 6.02 ± 0.00 | 6.05 ± 0.00 | 1361 ± 2  | 1366 ± 5  | -24.27 ± 0.47 | -23.37 ± 0.12 |
| PN 1 | 29 | 242.53 ± 4.02 | 249.47 ± 5.93 | 0.08 ± 0.03 | 0.09 ± 0.01 | 354.00 ± 20.22 | 365.67 ± 14.64 | 6.02 ± 0.00 | 6.05 ± 0.01 | 1333 ± 7  | 1332 ± 8  | -11.47 ± 0.31 | -10.43 ± 0.21 |
| PN 1 | 30 | 246.33 ± 6.57 | 242.37 ± 2.55 | 0.08 ± 0.03 | 0.07 ± 0.01 | 360.33 ± 24.85 | 350.33 ± 15.95 | 6.02 ± 0.01 | 6.05 ± 0.00 | 1285 ± 3  | 1291 ± 15 | -6.59 ± 0.20  | -6.97 ± 0.14  |
| PN 1 | 31 | 253.60 ± 3.35 | 247.30 ± 6.46 | 0.11 ± 0.01 | 0.08 ± 0.02 | 388.00 ± 9.00  | 361.67 ± 28.59 | 6.00 ± 0.00 | 6.03 ± 0.00 | 1355 ± 7  | 1357 ± 2  | -19.17 ± 0.46 | -13.90 ± 0.26 |
| PN 1 | 32 | 251.57 ± 6.13 | 247.30 ± 7.73 | 0.10 ± 0.01 | 0.08 ± 0.02 | 376.00 ± 23.39 | 363.33 ± 20.26 | 6.00 ± 0.00 | 6.04 ± 0.00 | 1323 ± 3  | 1329 ± 3  | -9.19 ± 0.10  | -9.75 ± 0.49  |
| PN 1 | 33 | 245.10 ± 2.65 | 247.27 ± 5.42 | 0.09 ± 0.01 | 0.08 ± 0.02 | 362.33 ± 10.02 | 360.00 ± 19.16 | 6.01 ± 0.00 | 6.04 ± 0.01 | 1272 ± 3  | 1269 ± 1  | -5.94 ± 0.44  | -5.10 ± 0.49  |
| PN 1 | 34 | 246.07 ± 1.46 | 252.90 ± 9.11 | 0.10 ± 0.01 | 0.1 ± 0.02  | 362.00 ± 5.29  | 384.00 ± 31.00 | 5.98 ± 0.01 | 5.99 ± 0.00 | 1398 ± 3  | 1397 ± 1  | -18.07 ± 0.45 | -15.30 ± 0.79 |
| PN 1 | 35 | 239.80 ± 4.28 | 247.33 ± 3.66 | 0.08 ± 0.03 | 0.1 ± 0.01  | 346.00 ± 13.11 | 369.33 ± 9.45  | 5.98 ± 0.01 | 5.99 ± 0.00 | 1453 ± 10 | 1443 ± 3  | -8.99 ± 0.19  | -8.94 ± 0.76  |
| PN 1 | 36 | 243.90 ± 4.20 | 244.37 ± 6.93 | 0.07 ± 0.01 | 0.08 ± 0.02 | 355.33 ± 15.50 | 357.00 ± 24.58 | 5.99 ± 0.01 | 6.00 ± 0.00 | 1509 ± 2  | 1504 ± 1  | -5.68 ± 0.32  | -5.01 ± 0.52  |
| PN 1 | 37 | 249.97 ± 0.35 | 242.03 ± 3.20 | 0.10 ± 0.01 | 0.06 ± 0.01 | 377.00 ± 7.55  | 343.00 ± 13.45 | 6.33 ± 0.00 | 6.34 ± 0.02 | 1380 ± 1  | 1388 ± 8  | -37.17 ± 0.71 | -14.47 ± 0.49 |
| PN 1 | 38 | 247.63 ± 4.80 | 248.10 ± 2.54 | 0.10 ± 0.03 | 0.07 ± 0.02 | 364.33 ± 21.13 | 365.00 ± 2.65  | 6.68 ± 0.01 | 6.70 ± 0.01 | 1377 ± 3  | 1391 ± 2  | -38.00 ± 0.96 | -16.73 ± 0.25 |
| PN 1 | 39 | 246.73 ± 2.72 | 246.17 ± 2.22 | 0.08 ± 0.03 | 0.08 ± 0.01 | 365.67 ± 15.14 | 358.67 ± 17.21 | 6.92 ± 0.01 | 6.96 ± 0.00 | 1385 ± 6  | 1408 ± 0  | -40.30 ± 1.04 | -38.37 ± 0.49 |
| PN 1 | 40 | 246.93 ± 3.19 | 246.97 ± 7.14 | 0.08 ± 0.01 | 0.09 ± 0.02 | 362.33 ± 12.42 | 361.33 ± 19.73 | 6.26 ± 0.00 | 6.29 ± 0.00 | 1435 ± 4  | 1415 ± 8  | -21.00 ± 0.35 | -20.53 ± 0.60 |
| PN 1 | 41 | 242.87 ± 4.41 | 242.27 ± 1.04 | 0.09 ± 0.01 | 0.06 ± 0.01 | 375.00 ± 2.00  | 344.00 ± 2.65  | 6.48 ± 0.01 | 6.50 ± 0.00 | 1481 ± 5  | 1471 ± 7  | -13.13 ± 0.74 | -12.83 ± 0.47 |
| PN 1 | 42 | 250.33 ± 2.12 | 242.47 ± 4.75 | 0.08 ± 0.02 | 0.06 ± 0.02 | 354.67 ± 18.50 | 346.67 ± 5.13  | 6.65 ± 0.00 | 6.64 ± 0.01 | 1543 ± 18 | 1539 ± 4  | -9.15 ± 0.13  | -9.10 ± 0.22  |
| PN 2 | 1  | 279.23 ± 4.22 | 293.53 ± 2.46 | 0.07 ± 0.02 | 0.11 ± 0.02 | 403.67 ± 15.95 | 446.67 ± 9.29  | 6.00 ± 0.01 | 6.02 ± 0.01 | 1362 ± 1  | 1334 ± 3  | -16.13 ± 0.21 | -16.60 ± 0.53 |
| PN 2 | 2  | 295.53 ± 9.15 | 292.93 ± 5.61 | 0.11 ± 0.01 | 0.10 ± 0.01 | 450.00 ± 26.06 | 439.00 ± 10.44 | 5.95 ± 0.02 | 5.99 ± 0.00 | 1416 ± 1  | 1398 ± 2  | -23.30 ± 2.39 | -20.97 ± 0.15 |
| PN 2 | 3  | 285.9 ± 3.99  | 292.70 ± 4.92 | 0.07 ± 0.02 | 0.08 ± 0.01 | 416.00 ± 13.00 | 428.00 ± 11.79 | 5.95 ± 0.00 | 5.99 ± 0.01 | 1635 ± 2  | 1614 ± 3  | -12.17 ± 0.55 | -12.63 ± 0.51 |
| PN 2 | 4  | 294.03 ± 3.76 | 291.23 ± 4.68 | 0.10 ± 0.01 | 0.10 ± 0.02 | 443.33 ± 10.79 | 436.00 ± 15.72 | 6.04 ± 0.00 | 6.08 ± 0.01 | 1359 ± 6  | 1348 ± 8  | -26.80 ± 0.30 | -26.70 ± 0.10 |
| PN 2 | 5  | 291.87 ± 1.36 | 295.93 ± 8.47 | 0.11 ± 0.01 | 0.11 ± 0.01 | 439.33 ± 4.04  | 446.00 ± 14.00 | 5.98 ± 0.00 | 6.02 ± 0.01 | 1352 ± 2  | 1342 ± 9  | -17.90 ± 0.53 | -11.63 ± 0.38 |
| PN 2 | 6  | 298.43 ± 2.95 | 300.47 ± 7.02 | 0.12 ± 0.01 | 0.11 ± 0.02 | 457.00 ± 7.00  | 461.67 ± 23.07 | 5.96 ± 0.00 | 5.99 ± 0.00 | 1360 ± 2  | 1351 ± 6  | -13.30 ± 0.46 | -9.97 ± 0.24  |
| PN 2 | 7  | 294.00 ± 9.73 | 291.63 ± 5.80 | 0.10 ± 0.03 | 0.09 ± 0.02 | 446.67 ± 28.68 | 430.67 ± 20.26 | 5.98 ± 0.01 | 6.02 ± 0.00 | 1353 ± 1  | 1340 ± 3  | -21.93 ± 0.55 | -18.37 ± 0.84 |

|      |    |               |                |             |             |                |                |             |             |           |           |               |               |
|------|----|---------------|----------------|-------------|-------------|----------------|----------------|-------------|-------------|-----------|-----------|---------------|---------------|
| PN 2 | 8  | 289.33 ± 8.43 | 297.87 ± 4.30  | 0.09 ± 0.03 | 0.10 ± 0.01 | 432.00 ± 23.81 | 450.33 ± 12.58 | 5.97 ± 0.01 | 6.01 ± 0.00 | 1343 ± 2  | 1325 ± 2  | −13.13 ± 0.55 | −13.43 ± 0.40 |
| PN 2 | 9  | 292.03 ± 6.29 | 295.53 ± 5.00  | 0.12 ± 0.01 | 0.10 ± 0.01 | 447.67 ± 11.59 | 444.33 ± 20.50 | 5.98 ± 0.00 | 6.01 ± 0.00 | 1326 ± 1  | 1308 ± 1  | −12.07 ± 0.55 | −9.62 ± 0.31  |
| PN 2 | 10 | 291.60 ± 5.07 | 294.13 ± 4.11  | 0.10 ± 0.03 | 0.10 ± 0.01 | 438.67 ± 16.17 | 439.67 ± 12.42 | 5.97 ± 0.00 | 6.01 ± 0.00 | 1359 ± 3  | 1346 ± 3  | −25.17 ± 0.86 | −19.33 ± 0.40 |
| PN 2 | 11 | 298.63 ± 4.64 | 296.60 ± 11.23 | 0.11 ± 0.03 | 0.11 ± 0.01 | 459.00 ± 25.12 | 447.33 ± 28.73 | 5.97 ± 0.00 | 5.99 ± 0.01 | 1345 ± 1  | 1334 ± 7  | −11.20 ± 0.17 | −11.80 ± 0.75 |
| PN 2 | 12 | 291.47 ± 8.78 | 293.23 ± 3.33  | 0.10 ± 0.02 | 0.07 ± 0.02 | 438.33 ± 25.54 | 428.67 ± 17.47 | 5.97 ± 0.00 | 5.99 ± 0.01 | 1331 ± 4  | 1311 ± 0  | −5.23 ± 0.41  | −5.70 ± 0.38  |
| PN 2 | 13 | 293.77 ± 3.62 | 296.03 ± 5.24  | 0.11 ± 0.01 | 0.09 ± 0.02 | 445.33 ± 12.10 | 440.33 ± 12.50 | 5.96 ± 0.01 | 5.99 ± 0.00 | 1373 ± 1  | 1342 ± 5  | −19.77 ± 0.70 | −18.40 ± 0.79 |
| PN 2 | 14 | 287.83 ± 1.33 | 294.87 ± 5.75  | 0.07 ± 0.02 | 0.10 ± 0.02 | 413.00 ± 15.59 | 441.00 ± 17.58 | 5.94 ± 0.00 | 5.96 ± 0.01 | 1416 ± 1  | 1381 ± 2  | −9.88 ± 0.27  | −10.50 ± 0.10 |
| PN 2 | 15 | 299.50 ± 4.79 | 294.47 ± 4.21  | 0.14 ± 0.02 | 0.10 ± 0.01 | 467.00 ± 17.58 | 443.33 ± 0.58  | 5.94 ± 0.01 | 5.97 ± 0.01 | 1607 ± 1  | 1591 ± 2  | −4.61 ± 0.25  | −5.21 ± 1.00  |
| PN 2 | 16 | 294.47 ± 4.65 | 300.07 ± 7.95  | 0.11 ± 0.01 | 0.11 ± 0.02 | 449.33 ± 15.31 | 459.33 ± 23.03 | 6.23 ± 0.00 | 6.29 ± 0.02 | 1371 ± 6  | 1347 ± 2  | −11.87 ± 0.32 | −24.10 ± 0.66 |
| PN 2 | 17 | 300.97 ± 9.60 | 297.43 ± 4.22  | 0.12 ± 0.03 | 0.12 ± 0.02 | 471.00 ± 34.39 | 454.33 ± 13.32 | 6.38 ± 0.00 | 6.47 ± 0.00 | 1368 ± 3  | 1353 ± 0  | −11.20 ± 0.46 | −21.63 ± 0.81 |
| PN 2 | 18 | 293.53 ± 2.66 | 290.37 ± 8.31  | 0.10 ± 0.01 | 0.09 ± 0.01 | 440.00 ± 3.00  | 427.33 ± 24.66 | 6.94 ± 0.01 | 7.01 ± 0.01 | 1388 ± 8  | 1373 ± 1  | −28.50 ± 0.44 | −30.63 ± 0.76 |
| PN 2 | 19 | 301.40 ± 3.86 | 297.37 ± 9.86  | 0.13 ± 0.01 | 0.11 ± 0.01 | 476.67 ± 17.62 | 455.00 ± 25.63 | 6.21 ± 0.01 | 6.31 ± 0.00 | 1363 ± 10 | 1359 ± 6  | −23.03 ± 0.15 | −21.93 ± 0.06 |
| PN 2 | 20 | 291.77 ± 1.44 | 287.43 ± 8.89  | 0.10 ± 0.00 | 0.08 ± 0.04 | 440.33 ± 5.86  | 420.67 ± 30.66 | 6.34 ± 0.01 | 6.34 ± 0.00 | 1409 ± 0  | 1395 ± 1  | −13.57 ± 0.15 | −13.07 ± 0.40 |
| PN 2 | 21 | 284.93 ± 5.78 | 287.47 ± 7.92  | 0.09 ± 0.02 | 0.08 ± 0.02 | 422.00 ± 16.70 | 420.00 ± 23.39 | 6.60 ± 0.00 | 6.70 ± 0.01 | 1622 ± 5  | 1613 ± 7  | −8.78 ± 0.22  | −9.53 ± 0.37  |
| PN 2 | 22 | 287.77 ± 2.55 | 290.77 ± 1.76  | 0.10 ± 0.05 | 0.09 ± 0.01 | 425.33 ± 21.22 | 433.00 ± 7.81  | 6.00 ± 0.00 | 6.02 ± 0.01 | 1400 ± 7  | 1389 ± 11 | −15.93 ± 0.65 | −21.67 ± 0.50 |
| PN 2 | 23 | 283.10 ± 3.31 | 288.67 ± 7.77  | 0.10 ± 0.03 | 0.10 ± 0.03 | 426.67 ± 12.06 | 429.33 ± 28.94 | 5.99 ± 0.01 | 5.99 ± 0.00 | 1478 ± 1  | 1483 ± 1  | −11.03 ± 0.42 | −16.33 ± 1.07 |
| PN 2 | 24 | 294.07 ± 3.48 | 288.07 ± 7.65  | 0.10 ± 0.01 | 0.11 ± 0.02 | 446.33 ± 6.35  | 434.00 ± 28.16 | 5.98 ± 0.01 | 5.99 ± 0.01 | 1594 ± 12 | 1606 ± 1  | −15.57 ± 2.22 | −14.43 ± 1.50 |
| PN 2 | 25 | 297.67 ± 5.71 | 287.07 ± 4.03  | 0.11 ± 0.01 | 0.10 ± 0.01 | 459.33 ± 18.18 | 429.33 ± 6.43  | 6.06 ± 0.01 | 6.04 ± 0.01 | 1367 ± 1  | 1362 ± 1  | −12.37 ± 0.06 | −20.17 ± 0.55 |
| PN 2 | 26 | 283.33 ± 1.80 | 291.53 ± 5.70  | 0.09 ± 0.02 | 0.11 ± 0.02 | 417.33 ± 19.14 | 443.00 ± 19.92 | 6.06 ± 0.01 | 6.03 ± 0.00 | 1363 ± 1  | 1362 ± 5  | −16.10 ± 0.36 | −14.70 ± 0.46 |
| PN 2 | 27 | 295.90 ± 8.49 | 286.40 ± 0.87  | 0.10 ± 0.01 | 0.11 ± 0.03 | 449.67 ± 24.42 | 432.67 ± 6.66  | 6.02 ± 0.01 | 6.01 ± 0.01 | 1363 ± 1  | 1374 ± 4  | −16.33 ± 0.38 | −10.25 ± 0.49 |
| PN 2 | 28 | 291.47 ± 8.86 | 289.20 ± 5.04  | 0.10 ± 0.02 | 0.09 ± 0.03 | 434.67 ± 26.86 | 431.00 ± 15.52 | 6.02 ± 0.01 | 6.05 ± 0.00 | 1357 ± 4  | 1366 ± 3  | −16.70 ± 0.10 | −18.60 ± 0.35 |
| PN 2 | 29 | 290.90 ± 9.54 | 286.10 ± 2.21  | 0.09 ± 0.03 | 0.08 ± 0.02 | 430.67 ± 31.21 | 420.33 ± 15.28 | 6.02 ± 0.00 | 6.04 ± 0.00 | 1311 ± 2  | 1328 ± 5  | −7.73 ± 0.29  | −9.55 ± 0.40  |
| PN 2 | 30 | 292.73 ± 8.30 | 292.70 ± 3.12  | 0.10 ± 0.01 | 0.11 ± 0.01 | 442.33 ± 23.71 | 445.67 ± 4.73  | 6.04 ± 0.00 | 6.05 ± 0.00 | 1258 ± 5  | 1291 ± 4  | −4.36 ± 0.48  | −4.51 ± 0.17  |
| PN 2 | 31 | 287.47 ± 3.43 | 287.70 ± 7.13  | 0.11 ± 0.01 | 0.09 ± 0.02 | 431.00 ± 2.38  | 430.67 ± 22.50 | 6.02 ± 0.00 | 6.03 ± 0.00 | 1349 ± 1  | 1373 ± 6  | −15.00 ± 0.62 | −17.27 ± 0.21 |
| PN 2 | 32 | 286.47 ± 3.46 | 295.83 ± 5.63  | 0.09 ± 0.00 | 0.12 ± 0.01 | 425.33 ± 6.43  | 458.33 ± 14.64 | 6.02 ± 0.00 | 6.03 ± 0.00 | 1311 ± 1  | 1320 ± 3  | −5.92 ± 0.14  | −7.31 ± 0.30  |
| PN 2 | 33 | 292.27 ± 4.13 | 296.67 ± 6.16  | 0.11 ± 0.02 | 0.11 ± 0.02 | 437.33 ± 12.42 | 455.67 ± 23.86 | 6.05 ± 0.00 | 6.05 ± 0.00 | 1238 ± 2  | 1292 ± 6  | −2.33 ± 0.35  | −3.76 ± 0.16  |
| PN 2 | 34 | 291.93 ± 1.63 | 286.90 ± 8.43  | 0.12 ± 0.02 | 0.10 ± 0.02 | 448.00 ± 3.46  | 426.67 ± 32.72 | 5.99 ± 0.01 | 6.00 ± 0.00 | 1399 ± 1  | 1401 ± 12 | −13.53 ± 0.12 | −12.33 ± 0.40 |
| PN 2 | 35 | 289.77 ± 7.75 | 288.03 ± 4.04  | 0.08 ± 0.01 | 0.10 ± 0.02 | 427.33 ± 21.50 | 432.00 ± 19.08 | 5.99 ± 0.01 | 5.99 ± 0.00 | 1428 ± 6  | 1448 ± 3  | −6.16 ± 0.43  | −5.89 ± 0.15  |
| PN 2 | 36 | 283.90 ± 2.01 | 288.50 ± 3.41  | 0.09 ± 0.00 | 0.10 ± 0.01 | 415.00 ± 2.00  | 434.00 ± 15.59 | 6.00 ± 0.01 | 6.00 ± 0.02 | 1508 ± 3  | 1475 ± 2  | −2.16 ± 0.41  | −2.32 ± 0.91  |
| PN 2 | 37 | 294.53 ± 5.84 | 289.60 ± 6.80  | 0.12 ± 0.02 | 0.10 ± 0.01 | 448.67 ± 14.47 | 433.67 ± 25.74 | 6.34 ± 0.00 | 6.35 ± 0.00 | 1374 ± 1  | 1369 ± 2  | −23.00 ± 0.17 | −25.30 ± 0.10 |
| PN 2 | 38 | 287.47 ± 1.60 | 288.50 ± 5.97  | 0.10 ± 0.01 | 0.09 ± 0.04 | 424.67 ± 2.08  | 430.67 ± 21.78 | 6.67 ± 0.00 | 6.68 ± 0.01 | 1386 ± 15 | 1378 ± 3  | −26.33 ± 0.91 | −32.13 ± 0.91 |

|      |    |                |                |             |             |                |                |             |             |           |           |               |               |
|------|----|----------------|----------------|-------------|-------------|----------------|----------------|-------------|-------------|-----------|-----------|---------------|---------------|
| PN 2 | 39 | 295.03 ± 4.72  | 287.13 ± 6.21  | 0.10 ± 0.01 | 0.12 ± 0.01 | 444.33 ± 11.50 | 439.33 ± 13.05 | 6.92 ± 0.00 | 6.94 ± 0.00 | 1392 ± 1  | 1409 ± 24 | -31.17 ± 1.11 | -30.63 ± 1.25 |
| PN 2 | 40 | 284.77 ± 3.18  | 292.57 ± 2.40  | 0.11 ± 0.02 | 0.09 ± 0.03 | 420.33 ± 18.58 | 439.00 ± 9.54  | 6.28 ± 0.01 | 6.31 ± 0.00 | 1388 ± 8  | 1390 ± 11 | -1407 ± 0.38  | -15.43 ± 0.74 |
| PN 2 | 41 | 287.57 ± 1.11  | 297.13 ± 6.37  | 0.09 ± 0.01 | 0.12 ± 0.03 | 424.67 ± 7.23  | 465.33 ± 25.70 | 6.47 ± 0.01 | 6.51 ± 0.01 | 1461 ± 16 | 1441 ± 2  | -9.25 ± 0.44  | -8.60 ± 0.68  |
| PN 2 | 42 | 289.73 ± 4.21  | 288.13 ± 4.91  | 0.09 ± 0.01 | 0.10 ± 0.01 | 430.00 ± 13.45 | 433.33 ± 14.64 | 6.62 ± 0.01 | 6.66 ± 0.01 | 1518 ± 1  | 1501 ± 3  | -5.91 ± 0.39  | -6.17 ± 0.56  |
| PN 3 | 1  | 344.13 ± 8.26  | 329.17 ± 5.10  | 0.13 ± 0.01 | 0.12 ± 0.03 | 542.67 ± 27.43 | 498.67 ± 11.93 | 5.99 ± 0.00 | 6.00 ± 0.01 | 1392 ± 0  | 1383 ± 15 | -28.20 ± 0.89 | -27.40 ± 0.96 |
| PN 3 | 2  | 337.93 ± 1.05  | 348.87 ± 9.36  | 0.10 ± 0.03 | 0.14 ± 0.03 | 510.67 ± 17.62 | 548.33 ± 37.82 | 5.95 ± 0.00 | 5.96 ± 0.01 | 1452 ± 3  | 1448 ± 4  | -23.03 ± 0.84 | -20.40 ± 1.21 |
| PN 3 | 3  | 335.53 ± 15.83 | 338.83 ± 5.46  | 0.08 ± 0.04 | 0.11 ± 0.01 | 504.33 ± 52.97 | 512.00 ± 9.17  | 5.93 ± 0.01 | 5.96 ± 0.00 | 1658 ± 7  | 1657 ± 1  | -13.87 ± 0.55 | -15.73 ± 0.67 |
| PN 3 | 4  | 347.00 ± 7.79  | 342.87 ± 6.45  | 0.12 ± 0.02 | 0.11 ± 0.01 | 546.67 ± 32.58 | 518.67 ± 21.50 | 6.03 ± 0.01 | 6.06 ± 0.00 | 1387 ± 8  | 1387 ± 5  | -29.17 ± 0.31 | -20.50 ± 0.78 |
| PN 3 | 5  | 332.33 ± 5.16  | 341.60 ± 6.36  | 0.11 ± 0.02 | 0.11 ± 0.02 | 501.67 ± 14.43 | 525.67 ± 25.54 | 5.98 ± 0.00 | 6.00 ± 0.01 | 1385 ± 1  | 1386 ± 1  | -25.40 ± 1.21 | -16.43 ± 0.25 |
| PN 3 | 6  | 348.33 ± 3.84  | 349.87 ± 11.05 | 0.11 ± 0.02 | 0.14 ± 0.03 | 541.33 ± 25.77 | 555.67 ± 33.01 | 5.95 ± 0.00 | 5.97 ± 0.01 | 1387 ± 3  | 1390 ± 2  | -10.50 ± 0.36 | -11.50 ± 0.10 |
| PN 3 | 7  | 346.70 ± 10.69 | 347.53 ± 15.07 | 0.13 ± 0.01 | 0.12 ± 0.04 | 547.33 ± 33.49 | 542.33 ± 58.60 | 5.97 ± 0.01 | 6.01 ± 0.00 | 1389 ± 4  | 1401 ± 2  | -23.93 ± 0.58 | -23.87 ± 0.64 |
| PN 3 | 8  | 334.17 ± 16.28 | 343.67 ± 3.45  | 0.10 ± 0.03 | 0.12 ± 0.01 | 508.67 ± 51.54 | 523.33 ± 8.02  | 5.97 ± 0.00 | 6.00 ± 0.00 | 1375 ± 5  | 1373 ± 1  | -14.67 ± 0.40 | -16.27 ± 0.40 |
| PN 3 | 9  | 352.47 ± 13.86 | 342.50 ± 6.33  | 0.12 ± 0.02 | 0.11 ± 0.03 | 552.00 ± 40.63 | 528.00 ± 2425  | 5.98 ± 0.00 | 6.00 ± 0.00 | 1352 ± 1  | 1351 ± 2  | -10.53 ± 0.32 | -11.37 ± 0.57 |
| PN 3 | 10 | 349.70 ± 3.39  | 335.03 ± 2.75  | 0.13 ± 0.01 | 0.12 ± 0.04 | 557.67 ± 4.73  | 513.00 ± 18.68 | 5.97 ± 0.01 | 6.02 ± 0.00 | 1389 ± 4  | 1389 ± 11 | -22.37 ± 0.55 | -21.97 ± 0.45 |
| PN 3 | 11 | 335.70 ± 15.10 | 345.03 ± 3.6   | 0.11 ± 0.03 | 0.12 ± 0.02 | 501.00 ± 49.24 | 528.67 ± 10.60 | 5.96 ± 0.00 | 5.99 ± 0.00 | 1360 ± 10 | 1366 ± 12 | -12.13 ± 0.35 | -13.97 ± 0.25 |
| PN 3 | 12 | 331.63 ± 10.42 | 342.80 ± 6.68  | 0.12 ± 0.01 | 0.11 ± 0.02 | 503.33 ± 25.03 | 523.00 ± 22.52 | 5.98 ± 0.00 | 6.00 ± 0.00 | 1348 ± 11 | 1346 ± 2  | -5.53 ± 0.33  | -6.80 ± 0.12  |
| PN 3 | 13 | 342.30 ± 8.52  | 342.97 ± 11.35 | 0.12 ± 0.02 | 0.14 ± 0.03 | 528.67 ± 21.78 | 534.00 ± 21.28 | 5.96 ± 0.00 | 5.99 ± 0.01 | 1377 ± 23 | 1405 ± 6  | -21.23 ± 0.46 | -22.03 ± 0.21 |
| PN 3 | 14 | 339.27 ± 15.52 | 343.67 ± 3.84  | 0.13 ± 0.03 | 0.10 ± 0.01 | 530.33 ± 27.43 | 523.33 ± 14.74 | 5.91 ± 0.01 | 5.96 ± 0.00 | 1431 ± 3  | 1440 ± 1  | -11.17 ± 0.25 | -12.70 ± 0.40 |
| PN 3 | 15 | 332.53 ± 4.65  | 348.10 ± 14.17 | 0.08 ± 0.01 | 0.12 ± 0.01 | 494.33 ± 8.50  | 540.33 ± 41.79 | 5.91 ± 0.01 | 5.98 ± 0.01 | 1678 ± 7  | 1651 ± 0  | -6.03 ± 0.13  | -6.29 ± 0.25  |
| PN 3 | 16 | 341.47 ± 16.75 | 339.47 ± 13.20 | 0.12 ± 0.03 | 0.13 ± 0.01 | 532.00 ± 57.30 | 520.00 ± 32.14 | 6.26 ± 0.00 | 6.32 ± 0.00 | 1396 ± 2  | 1390 ± 6  | -27.93 ± 0.25 | -25.40 ± 0.82 |
| PN 3 | 17 | 335.13 ± 2.05  | 339.17 ± 8.50  | 0.11 ± 0.01 | 0.10 ± 0.03 | 509.33 ± 8.02  | 514.00 ± 35.04 | 6.42 ± 0.00 | 6.50 ± 0.01 | 1396 ± 3  | 1394 ± 0  | -16.17 ± 0.21 | -21.67 ± 0.49 |
| PN 3 | 18 | 335.03 ± 3.04  | 351.00 ± 13.91 | 0.10 ± 0.01 | 0.14 ± 0.01 | 507.00 ± 11.00 | 562.00 ± 34.04 | 7.00 ± 0.00 | 7.04 ± 0.01 | 1424 ± 1  | 1421 ± 4  | -29.30 ± 0.61 | -32.87 ± 0.38 |
| PN 3 | 19 | 339.50 ± 14.78 | 328.43 ± 12.11 | 0.13 ± 0.01 | 0.15 ± 0.02 | 525.00 ± 39.69 | 503.00 ± 17.35 | 6.27 ± 0.04 | 6.29 ± 0.00 | 1399 ± 4  | 1400 ± 9  | -24.10 ± 0.66 | -26.00 ± 0.36 |
| PN 3 | 20 | 337.30 ± 2.55  | 341.97 ± 9.60  | 0.11 ± 0.02 | 0.10 ± 0.03 | 512.67 ± 11.37 | 523.67 ± 34.08 | 6.30 ± 0.00 | 6.38 ± 0.00 | 1430 ± 1  | 1450 ± 1  | -13.07 ± 0.12 | -14.20 ± 0.36 |
| PN 3 | 21 | 339.40 ± 9.14  | 335.77 ± 7.46  | 0.13 ± 0.02 | 0.11 ± 0.02 | 530.67 ± 17.95 | 513.33 ± 28.71 | 6.61 ± 0.00 | 6.73 ± 0.01 | 1668 ± 3  | 1675 ± 2  | -7.23 ± 0.53  | -10.63 ± 0.12 |
| PN 3 | 22 | 333.17 ± 6.04  | 334.60 ± 7.61  | 0.12 ± 0.03 | 0.12 ± 0.00 | 508.00 ± 19.92 | 512.33 ± 24.95 | 6.06 ± 0.00 | 6.05 ± 0.01 | 1412 ± 3  | 1400 ± 6  | -24.13 ± 0.60 | -23.10 ± 0.78 |
| PN 3 | 23 | 349.63 ± 7.36  | 330.80 ± 5.01  | 0.14 ± 0.01 | 0.10 ± 0.02 | 558.33 ± 24.79 | 494.67 ± 17.01 | 6.01 ± 0.01 | 6.02 ± 0.01 | 1530 ± 5  | 1572 ± 6  | -17.60 ± 0.56 | -20.47 ± 0.42 |
| PN 3 | 24 | 323.97 ± 5.59  | 340.50 ± 18.04 | 0.10 ± 0.04 | 0.14 ± 0.02 | 479.33 ± 16.77 | 534.00 ± 50.48 | 6.01 ± 0.00 | 6.02 ± 0.01 | 1617 ± 7  | 1636 ± 7  | -21.27 ± 2.10 | -16.83 ± 1.66 |
| PN 3 | 25 | 344.50 ± 8.31  | 332.37 ± 1.27  | 0.14 ± 0.01 | 0.11 ± 0.04 | 540.67 ± 21.13 | 502.00 ± 15.00 | 6.04 ± 0.00 | 6.07 ± 0.01 | 1383 ± 15 | 1382 ± 5  | -20.73 ± 0.38 | -20.57 ± 0.15 |
| PN 3 | 26 | 332.73 ± 2.40  | 342.63 ± 17.84 | 0.10 ± 0.01 | 0.10 ± 0.04 | 502.33 ± 7.77  | 526.33 ± 53.01 | 6.02 ± 0.01 | 6.07 ± 0.00 | 1367 ± 4  | 1383 ± 4  | -18.53 ± 0.31 | -15.73 ± 0.12 |
| PN 3 | 27 | 337.50 ± 6.95  | 337.97 ± 11.14 | 0.12 ± 0.02 | 0.11 ± 0.03 | 517.67 ± 12.58 | 516.00 ± 28.16 | 6.01 ± 0.00 | 6.05 ± 0.00 | 1390 ± 4  | 1382 ± 3  | -14.77 ± 0.49 | -14.47 ± 0.38 |

|      |    |                |                |             |             |                |                |             |             |           |           |               |               |
|------|----|----------------|----------------|-------------|-------------|----------------|----------------|-------------|-------------|-----------|-----------|---------------|---------------|
| PN 3 | 28 | 376.23 ± 25.72 | 337.57 ± 5.08  | 0.20 ± 0.03 | 0.10 ± 0.01 | 683.67 ± 22.12 | 511.33 ± 11.02 | 6.04 ± 0.00 | 6.07 ± 0.00 | 1371 ± 9  | 1380 ± 1  | -21.37 ± 0.29 | -22.10 ± 0.75 |
| PN 3 | 29 | 344.93 ± 12.00 | 333.07 ± 8.63  | 0.12 ± 0.02 | 0.10 ± 0.02 | 541.33 ± 42.45 | 496.67 ± 14.47 | 6.04 ± 0.01 | 6.08 ± 0.01 | 1315 ± 7  | 1337 ± 3  | -9.68 ± 0.41  | -10.97 ± 0.40 |
| PN 3 | 30 | 348.03 ± 12.62 | 331.37 ± 6.60  | 0.18 ± 0.02 | 0.10 ± 0.02 | 590.00 ± 37.36 | 498.33 ± 20.60 | 6.05 ± 0.00 | 6.09 ± 0.00 | 1285 ± 4  | 1290 ± 5  | -5.51 ± 0.10  | -7.19 ± 0.30  |
| PN 3 | 31 | 339.37 ± 10.40 | 340.00 ± 1.40  | 0.11 ± 0.02 | 0.10 ± 0.00 | 529.67 ± 33.32 | 516.33 ± 1.15  | 6.02 ± 0.00 | 6.06 ± 0.00 | 1360 ± 11 | 1374 ± 4  | -16.70 ± 0.10 | -18.33 ± 0.42 |
| PN 3 | 32 | 353.33 ± 28.27 | 329.83 ± 7.88  | 0.17 ± 0.02 | 0.10 ± 0.03 | 587.67 ± 71.25 | 491.00 ± 32.23 | 6.03 ± 0.01 | 6.07 ± 0.01 | 1323 ± 1  | 1326 ± 2  | -8.00 ± 0.21  | -9.05 ± 0.74  |
| PN 3 | 33 | 329.80 ± 8.81  | 327.53 ± 2.38  | 0.10 ± 0.05 | 0.09 ± 0.03 | 488.67 ± 26.39 | 480.33 ± 10.21 | 6.05 ± 0.00 | 6.08 ± 0.00 | 1252 ± 9  | 1286 ± 10 | -3.90 ± 0.34  | -5.17 ± 0.03  |
| PN 3 | 34 | 336.37 ± 16.96 | 334.80 ± 4.10  | 0.20 ± 0.00 | 0.11 ± 0.01 | 573.33 ± 31.72 | 515.33 ± 16.07 | 6.00 ± 0.01 | 6.02 ± 0.00 | 1392 ± 2  | 1414 ± 1  | -15.17 ± 0.31 | -15.47 ± 0.15 |
| PN 3 | 35 | 337.50 ± 6.02  | 329.77 ± 8.08  | 0.11 ± 0.02 | 0.11 ± 0.02 | 515.67 ± 15.50 | 498.67 ± 18.18 | 6.00 ± 0.00 | 6.02 ± 0.00 | 1430 ± 10 | 1450 ± 11 | -7.16 ± 0.20  | -8.26 ± 0.39  |
| PN 3 | 36 | 367.43 ± 26.14 | 329.20 ± 2.86  | 0.23 ± 0.00 | 0.10 ± 0.02 | 683.00 ± 66.55 | 495.00 ± 11.36 | 6.00 ± 0.01 | 6.05 ± 0.00 | 1516 ± 5  | 1516 ± 2  | -3.81 ± 0.12  | -4.73 ± 0.68  |
| PN 3 | 37 | 333.33 ± 1.11  | 335.57 ± 5.71  | 0.10 ± 0.03 | 0.10 ± 0.01 | 499.33 ± 13.80 | 503.33 ± 16.50 | 6.38 ± 0.01 | 6.41 ± 0.01 | 1405 ± 1  | 1393 ± 2  | -29.80 ± 0.35 | -31.27 ± 0.71 |
| PN 3 | 38 | 339.23 ± 3.01  | 340.53 ± 8.14  | 0.11 ± 0.02 | 0.12 ± 0.01 | 522.67 ± 14.36 | 532.67 ± 32.25 | 6.76 ± 0.00 | 6.80 ± 0.00 | 1424 ± 24 | 1383 ± 14 | -33.10 ± 0.00 | -35.97 ± 0.15 |
| PN 3 | 39 | 341.53 ± 14.50 | 337.73 ± 8.45  | 0.11 ± 0.01 | 0.12 ± 0.02 | 529.00 ± 42.51 | 520.00 ± 15.62 | 7.01 ± 0.00 | 7.04 ± 0.00 | 1399 ± 3  | 1428 ± 9  | -32.37 ± 0.93 | -32.67 ± 0.71 |
| PN 3 | 40 | 337.97 ± 3.21  | 337.33 ± 2.61  | 0.11 ± 0.01 | 0.11 ± 0.01 | 516.00 ± 6.56  | 523.00 ± 4.36  | 6.30 ± 0.01 | 6.44 ± 0.03 | 1394 ± 6  | 1430 ± 11 | -16.97 ± 0.31 | -17.50 ± 0.62 |
| PN 3 | 41 | 348.13 ± 1.86  | 329.17 ± 5.37  | 0.14 ± 0.01 | 0.10 ± 0.03 | 559.00 ± 5.20  | 489.00 ± 18.52 | 6.56 ± 0.00 | 6.60 ± 0.00 | 1449 ± 0  | 1482 ± 1  | -10.09 ± 0.62 | -10.77 ± 0.42 |
| PN 3 | 42 | 330.77 ± 3.27  | 341.40 ± 11.34 | 0.12 ± 0.03 | 0.12 ± 0.05 | 498.00 ± 11.53 | 529.33 ± 51.33 | 6.72 ± 0.00 | 6.76 ± 0.01 | 1506 ± 2  | 1561 ± 2  | -7.07 ± 0.41  | -8.20 ± 0.37  |
| PN 4 | 1  | 335.23 ± 2.63  | 330.90 ± 6.56  | 0.12 ± 0.02 | 0.11 ± 0.01 | 522.67 ± 16.26 | 497.33 ± 17.16 | 6.01 ± 0.00 | 6.03 ± 0.00 | 1340 ± 3  | 1339 ± 16 | -27.03 ± 0.76 | -32.13 ± 0.57 |
| PN 4 | 2  | 333.10 ± 5.03  | 323.47 ± 2.87  | 0.13 ± 0.03 | 0.08 ± 0.02 | 529.33 ± 26.16 | 476.33 ± 21.55 | 5.98 ± 0.00 | 6.00 ± 0.01 | 1392 ± 1  | 1407 ± 5  | -14.00 ± 0.82 | -21.80 ± 0.53 |
| PN 4 | 3  | 331.87 ± 7.52  | 325.80 ± 7.93  | 0.10 ± 0.03 | 0.14 ± 0.02 | 504.00 ± 32.23 | 511.33 ± 26.86 | 5.97 ± 0.00 | 5.98 ± 0.00 | 1641 ± 3  | 1654 ± 1  | -16.37 ± 0.38 | -14.30 ± 0.46 |
| PN 4 | 4  | 326.83 ± 7.81  | 323.50 ± 2.63  | 0.11 ± 0.03 | 0.12 ± 0.03 | 496.67 ± 28.92 | 495.00 ± 20.07 | 6.06 ± 0.00 | 6.08 ± 0.00 | 1338 ± 1  | 1359 ± 5  | -33.73 ± 1.50 | -29.67 ± 1.02 |
| PN 4 | 5  | 335.23 ± 2.63  | 330.90 ± 6.56  | 0.12 ± 0.02 | 0.11 ± 0.01 | 522.67 ± 16.26 | 497.33 ± 17.16 | 5.99 ± 0.00 | 6.02 ± 0.00 | 1343 ± 4  | 1351 ± 2  | -21.63 ± 0.40 | -15.37 ± 0.75 |
| PN 4 | 6  | 332.23 ± 18.15 | 330.93 ± 5.47  | 0.11 ± 0.04 | 0.11 ± 0.02 | 513.67 ± 63.69 | 511.67 ± 17.01 | 5.97 ± 0.00 | 5.99 ± 0.00 | 1337 ± 7  | 1349 ± 5  | -13.17 ± 0.60 | -11.87 ± 0.55 |
| PN 4 | 7  | 329.60 ± 9.13  | 323.63 ± 1.33  | 0.11 ± 0.02 | 0.10 ± 0.03 | 507.67 ± 32.50 | 489.33 ± 17.10 | 6.00 ± 0.00 | 6.03 ± 0.01 | 1341 ± 5  | 1358 ± 3  | -23.83 ± 0.42 | -23.27 ± 0.38 |
| PN 4 | 8  | 328.03 ± 7.05  | 326.17 ± 7.98  | 0.10 ± 0.02 | 0.10 ± 0.03 | 499.00 ± 19.08 | 489.00 ± 36.39 | 6.00 ± 0.00 | 6.01 ± 0.00 | 1329 ± 3  | 1351 ± 5  | -16.30 ± 0.56 | -15.83 ± 0.29 |
| PN 4 | 9  | 325.70 ± 1.55  | 332.87 ± 7.30  | 0.10 ± 0.01 | 0.13 ± 0.00 | 490.00 ± 13.23 | 521.33 ± 17.10 | 6.00 ± 0.00 | 6.01 ± 0.00 | 1300 ± 5  | 1320 ± 5  | -11.10 ± 0.17 | -10.73 ± 0.67 |
| PN 4 | 10 | 325.93 ± 11.03 | 330.13 ± 4.94  | 0.12 ± 0.02 | 0.12 ± 0.01 | 495.67 ± 36.25 | 515.67 ± 17.95 | 6.00 ± 0.00 | 6.02 ± 0.00 | 1331 ± 1  | 1337 ± 10 | -24.00 ± 0.89 | -22.93 ± 0.65 |
| PN 4 | 11 | 328.30 ± 9.40  | 333.73 ± 3.36  | 0.11 ± 0.01 | 0.12 ± 0.01 | 498.67 ± 28.73 | 518.33 ± 8.96  | 5.98 ± 0.00 | 6.00 ± 0.00 | 1314 ± 7  | 1344 ± 2  | -13.33 ± 0.40 | -13.77 ± 0.15 |
| PN 4 | 12 | 331.63 ± 5.37  | 336.00 ± 3.83  | 0.11 ± 0.01 | 0.14 ± 0.02 | 512.00 ± 15.10 | 537.00 ± 13.45 | 5.99 ± 0.00 | 6.01 ± 0.00 | 1301 ± 2  | 1325 ± 13 | -7.21 ± 0.10  | -6.84 ± 0.63  |
| PN 4 | 13 | 334.73 ± 5.56  | 328.67 ± 7.91  | 0.12 ± 0.01 | 0.12 ± 0.02 | 521.00 ± 1.06  | 507.33 ± 11.37 | 5.98 ± 0.00 | 6.01 ± 0.00 | 1348 ± 6  | 1369 ± 4  | -21.47 ± 0.90 | -20.40 ± 0.26 |
| PN 4 | 14 | 330.60 ± 5.65  | 330.00 ± 4.26  | 0.12 ± 0.03 | 0.10 ± 0.01 | 510.00 ± 14.93 | 502.00 ± 12.12 | 5.95 ± 0.01 | 5.98 ± 0.01 | 1371 ± 6  | 1413 ± 5  | -12.43 ± 0.64 | -12.67 ± 0.12 |
| PN 4 | 15 | 330.97 ± 9.25  | 338.73 ± 7.48  | 0.10 ± 0.02 | 0.13 ± 0.01 | 505.67 ± 26.08 | 541.00 ± 23.64 | 5.98 ± 0.01 | 5.98 ± 0.00 | 1615 ± 9  | 1633 ± 3  | -6.13 ± 0.37  | -6.30 ± 0.41  |
| PN 4 | 16 | 327.47 ± 7.96  | 330.70 ± 13.20 | 0.11 ± 0.02 | 0.15 ± 0.01 | 492.67 ± 31.07 | 521.33 ± 30.50 | 6.25 ± 0.00 | 6.31 ± 0.00 | 1347 ± 3  | 1374 ± 7  | -27.60 ± 0.36 | -25.23 ± 0.67 |

|      |    |                |                |             |             |                |                |             |             |           |           |               |               |
|------|----|----------------|----------------|-------------|-------------|----------------|----------------|-------------|-------------|-----------|-----------|---------------|---------------|
| PN 4 | 17 | 325.60 ± 3.47  | 328.43 ± 6.54  | 0.10 ± 0.02 | 0.11 ± 0.00 | 490.67 ± 23.63 | 506.00 ± 9.54  | 6.45 ± 0.00 | 6.48 ± 0.00 | 1339 ± 4  | 1383 ± 10 | −30.20 ± 0.98 | −36.03 ± 0.40 |
| PN 4 | 18 | 332.63 ± 6.46  | 331.93 ± 7.42  | 0.13 ± 0.02 | 0.12 ± 0.02 | 515.33 ± 15.50 | 520.67 ± 35.50 | 7.01 ± 0.00 | 7.03 ± 0.00 | 1359 ± 0  | 1388 ± 5  | −31.23 ± 0.74 | −31.83 ± 0.68 |
| PN 4 | 19 | 328.43 ± 2.67  | 323.23 ± 0.68  | 0.11 ± 0.00 | 0.13 ± 0.01 | 503.33 ± 3.79  | 501.33 ± 7.57  | 6.20 ± 0.00 | 6.29 ± 0.00 | 1343 ± 1  | 1365 ± 6  | −22.90 ± 0.26 | −24.77 ± 0.70 |
| PN 4 | 20 | 333.30 ± 6.80  | 337.43 ± 10.20 | 0.10 ± 0.01 | 0.14 ± 0.02 | 508.33 ± 17.90 | 548.67 ± 32.25 | 6.31 ± 0.00 | 6.36 ± 0.01 | 1382 ± 5  | 1400 ± 2  | −14.07 ± 0.31 | −14.60 ± 0.72 |
| PN 4 | 21 | 335.70 ± 8.45  | 323.60 ± 3.21  | 0.12 ± 0.01 | 0.09 ± 0.02 | 524.00 ± 21.66 | 482.67 ± 22.48 | 6.71 ± 0.01 | 6.74 ± 0.00 | 1629 ± 1  | 1647 ± 10 | −9.11 ± 0.71  | −8.98 ± 0.47  |
| PN 4 | 22 | 323.83 ± 9.53  | 326.03 ± 6.44  | 0.10 ± 0.02 | 0.11 ± 0.02 | 494.67 ± 25.97 | 500.33 ± 28.15 | 6.03 ± 0.03 | 6.03 ± 0.00 | 1379 ± 18 | 1407 ± 21 | −28.63 ± 1.00 | −30.73 ± 1.18 |
| PN 4 | 23 | 325.43 ± 2.67  | 330.10 ± 3.30  | 0.11 ± 0.00 | 0.11 ± 0.02 | 504.33 ± 9.02  | 512.67 ± 11.68 | 5.99 ± 0.01 | 6.02 ± 0.00 | 1466 ± 10 | 1469 ± 3  | −22.00 ± 0.36 | −21.87 ± 0.50 |
| PN 4 | 24 | 321.23 ± 3.50  | 320.80 ± 2.88  | 0.09 ± 0.04 | 0.10 ± 0.00 | 488.67 ± 19.30 | 489.00 ± 6.08  | 6.00 ± 0.01 | 6.02 ± 0.01 | 1584 ± 1  | 1599 ± 2  | −18.53 ± 1.34 | −19.87 ± 2.23 |
| PN 4 | 25 | 315.67 ± 14.08 | 328.47 ± 13.71 | 0.13 ± 0.01 | 0.11 ± 0.03 | 478.00 ± 37.36 | 506.67 ± 45.54 | 6.05 ± 0.01 | 6.06 ± 0.01 | 1349 ± 0  | 1356 ± 3  | −24.93 ± 0.45 | −22.90 ± 0.36 |
| PN 4 | 26 | 324.43 ± 5.82  | 320.23 ± 13.04 | 0.13 ± 0.01 | 0.12 ± 0.04 | 508.33 ± 16.26 | 492.67 ± 42.90 | 6.04 ± 0.00 | 6.05 ± 0.00 | 1338 ± 7  | 1366 ± 5  | −16.33 ± 0.25 | −20.60 ± 0.26 |
| PN 4 | 27 | 329.90 ± 9.42  | 320.30 ± 5.55  | 0.13 ± 0.01 | 0.10 ± 0.00 | 518.67 ± 18.23 | 485.67 ± 17.50 | 6.02 ± 0.00 | 6.04 ± 0.00 | 1334 ± 4  | 1362 ± 14 | −13.87 ± 0.76 | −14.43 ± 0.42 |
| PN 4 | 28 | 333.67 ± 8.27  | 334.77 ± 8.58  | 0.12 ± 0.02 | 0.13 ± 0.01 | 521.00 ± 21.00 | 541.67 ± 27.75 | 6.05 ± 0.00 | 6.07 ± 0.01 | 1334 ± 6  | 1374 ± 1  | −23.13 ± 0.42 | −23.10 ± 0.66 |
| PN 4 | 29 | 323.67 ± 4.17  | 329.07 ± 13.94 | 0.11 ± 0.00 | 0.11 ± 0.03 | 494.67 ± 11.06 | 505.33 ± 46.76 | 6.04 ± 0.01 | 6.07 ± 0.00 | 1314 ± 1  | 1316 ± 9  | −11.40 ± 0.20 | −12.60 ± 0.10 |
| PN 4 | 30 | 326.33 ± 11.44 | 321.50 ± 3.15  | 0.10 ± 0.02 | 0.10 ± 0.01 | 495.67 ± 24.01 | 485.00 ± 9.00  | 6.05 ± 0.00 | 6.08 ± 0.00 | 1259 ± 5  | 1289 ± 6  | −7.52 ± 0.45  | −6.66 ± 0.24  |
| PN 4 | 31 | 321.37 ± 7.81  | 311.53 ± 9.00  | 0.12 ± 0.02 | 0.11 ± 0.03 | 490.67 ± 22.03 | 456.67 ± 9.45  | 6.03 ± 0.00 | 6.05 ± 0.00 | 1338 ± 2  | 1365 ± 16 | −17.10 ± 0.40 | −17.57 ± 0.42 |
| PN 4 | 32 | 325.23 ± 8.95  | 320.13 ± 5.46  | 0.12 ± 0.02 | 0.12 ± 0.01 | 507.33 ± 20.13 | 484.33 ± 18.77 | 6.04 ± 0.01 | 6.06 ± 0.01 | 1314 ± 6  | 1310 ± 0  | −8.72 ± 0.19  | −8.80 ± 0.11  |
| PN 4 | 33 | 323.17 ± 5.58  | 321.60 ± 9.51  | 0.11 ± 0.01 | 0.10 ± 0.03 | 490.33 ± 14.74 | 484.67 ± 27.01 | 6.06 ± 0.01 | 6.07 ± 0.00 | 1256 ± 7  | 1276 ± 2  | −4.62 ± 0.21  | −4.77 ± 0.30  |
| PN 4 | 34 | 319.07 ± 3.78  | 320.03 ± 9.02  | 0.10 ± 0.01 | 0.10 ± 0.01 | 490.67 ± 17.56 | 480.67 ± 24.70 | 6.00 ± 0.00 | 6.02 ± 0.01 | 1367 ± 0  | 1410 ± 1  | −16.17 ± 0.12 | −15.33 ± 0.32 |
| PN 4 | 35 | 322.73 ± 10.51 | 322.57 ± 7.46  | 0.13 ± 0.02 | 0.11 ± 0.02 | 492.33 ± 31.01 | 493.00 ± 27.73 | 6.00 ± 0.00 | 6.03 ± 0.01 | 1412 ± 2  | 1455 ± 17 | −7.59 ± 0.34  | −8.49 ± 0.04  |
| PN 4 | 36 | 315.50 ± 4.85  | 326.60 ± 11.70 | 0.07 ± 0.03 | 0.11 ± 0.01 | 464.33 ± 24.03 | 510.67 ± 30.44 | 6.02 ± 0.00 | 6.04 ± 0.00 | 1485 ± 3  | 1508 ± 11 | −4.83 ± 0.38  | −4.35 ± 0.31  |
| PN 4 | 37 | 322.80 ± 8.76  | 321.10 ± 10.51 | 0.11 ± 0.02 | 0.11 ± 0.02 | 492.33 ± 28.59 | 486.33 ± 30.17 | 6.38 ± 0.00 | 6.41 ± 0.00 | 1349 ± 6  | 1385 ± 4  | −26.67 ± 0.74 | −27.73 ± 0.60 |
| PN 4 | 38 | 322.20 ± 8.26  | 319.23 ± 3.07  | 0.11 ± 0.02 | 0.10 ± 0.02 | 492.33 ± 32.59 | 484.00 ± 23.26 | 6.78 ± 0.00 | 6.80 ± 0.01 | 1358 ± 2  | 1384 ± 16 | −40.83 ± 0.40 | −34.87 ± 0.55 |
| PN 4 | 39 | 323.37 ± 6.95  | 324.07 ± 12.46 | 0.12 ± 0.01 | 0.11 ± 0.03 | 502.67 ± 16.07 | 498.00 ± 39.40 | 7.04 ± 0.00 | 7.05 ± 0.00 | 1374 ± 1  | 1393 ± 1  | −34.50 ± 0.75 | −36.03 ± 0.58 |
| PN 4 | 40 | 318.47 ± 10.68 | 327.27 ± 14.71 | 0.12 ± 0.01 | 0.11 ± 0.02 | 481.33 ± 25.32 | 503.67 ± 50.56 | 6.38 ± 0.01 | 6.44 ± 0.01 | 1377 ± 2  | 1385 ± 4  | −18.37 ± 0.29 | −19.73 ± 0.83 |
| PN 4 | 41 | 327.73 ± 4.79  | 322.47 ± 2.11  | 0.13 ± 0.02 | 0.11 ± 0.03 | 506.67 ± 9.50  | 492.67 ± 764   | 6.58 ± 0.00 | 6.61 ± 0.01 | 1437 ± 3  | 1449 ± 2  | −11.77 ± 0.61 | −11.77 ± 0.74 |
| PN 4 | 42 | 321.60 ± 3.39  | 322.93 ± 3.98  | 0.11 ± 0.01 | 0.10 ± 0.00 | 489.00 ± 13.11 | 489.33 ± 0.58  | 6.75 ± 0.01 | 6.78 ± 0.01 | 1520 ± 4  | 1552 ± 10 | −7.70 ± 0.46  | −8.24 ± 0.16  |

MDD – mean droplet diameter obtained by diffraction light scattering method  
Dv(90) – 90% of the particles lie below the value
